# Supplementary material for: Clinical and Cytogenetic Characterization of Early and Late Relapses in Patients Allografted for Myeloid Neoplasms with a Myelodysplastic Component
Source: MDPI journal article supplement (doi:10.3390/cancers14246244), 2022-12-18
Supplement: s1 [file s1]

# Supplemental Material: Clinical and Cytogenetic Characterization of Early and Late Relapses in Patients allografted for Myeloid Neoplasms with a Myelodysplastic Component

Victoria Platte, Anika Bergmann, Barbara Hildebrandt, Dagmar Wiczorek, Esther Schuler, Ulrich Germing, Jennifer Kaivers, Rainer Haas, Guido Kobbe, Thomas Schroeder and Christina Rautenberg

**Table S1.** Relapse Characteristics.

|                                 | No.          | %   |
|---------------------------------|--------------|-----|
| No.                             | 91           | 100 |
| Time to relapse, median         | 5.5          |     |
| (range), months                 | (0.5 - 110)  |     |
| WBC, median                     | 3.5          |     |
| (range), $\times 10^9/L$        | (0.4 - 20.2) |     |
| Type of relapse                 |              |     |
| Molecular                       | 23           | 25  |
| Hematologic                     | 68           | 75  |
| PB Blasts, median               | 0            |     |
| (range), %                      | (0 - 62)     |     |
| BM Blasts, median               | 7            |     |
| (range), %                      | (0 - 90)     |     |
| Median Hb, median               | 11,2         |     |
| (range), g/dL                   | (7 - 17)     |     |
| Platelets, median               | 87           |     |
| (range), $\times 10^9/L$        | (0.04 - 800) |     |
| PB chimerism, median (range), % | 84.2         |     |
|                                 | (0 - 100)    |     |
| BM chimerism, median (range), % | 86           |     |
|                                 | (1,2 - 100)  |     |

BM, bone marrow; Hb, hemoglobin; PB, peripheral blood; WBC, white blood cells.

**Table S2.** Pretransplant and post-transplant morphology and cytogenetics in 91 patients with myeloid neoplasms.

| UPN | WHO at diagnosis | Cytogenetics at diagnosis                                                                              | WHO at relapse | Cytogenetics at relapse                                                  |
|-----|------------------|--------------------------------------------------------------------------------------------------------|----------------|--------------------------------------------------------------------------|
| 1   | MDS-EB I         | 47,XY,+8[28], der7, del7q                                                                              | MDS-EB I       | 47,XY,+8[3]/46,XY[1]/46,XX[20]                                           |
| 2   | AML-MRC          | 47,XX,+8[17]/46,XX[5]                                                                                  | AML-MRC        | 47,XX +8[18]/47, idem, t(3;7)(q;q),add(17q)[2]/46,XY[2]/46,XX[1]         |
| 3   | MDS-EB II        | 45,XX,t(3,3)(q21;q26),-7[17]/46,XX[3]                                                                  | AML            | missing                                                                  |
| 4   | AML-MRC          | 47,XY,+8                                                                                               | AML            | 46,XY [24]                                                               |
| 5   | AML-MRC          | 46,XX,add(5)(q31),der(5)t(5;12)(q13;q13),-6,-12,der(20)(q11q13),add(21)(q22),-21,+mar1,+mar2,+mar3[14] | AML-MRC        | 46, XX, add(5)(q12), add(5)(q33) del(6)(q13) del(20)(q11)[3]/ 46; XY[18] |
| 6   | MDS-MLD          | 46,XY                                                                                                  | MDS-EB II      | 46, XY                                                                   |
| 7   | MDS-MLD          | 45,XY,del(3)(q1?),+4,der(5;17)(p11;q11),-7,+8,-18,-22[13]/46,XY[20]                                    | MDS-MLD        | 46,XY[22]                                                                |
| 8   | CMML II          | 46,XY[12]/del(10p)                                                                                     | CMML 0         | 46,XX[14]/46,XY[10]                                                      |
| 9   | MDS-EB II        | 46,XY                                                                                                  | AML            | 46, XY                                                                   |
| 10  | CMML I           | 47,XX +8                                                                                               | AML-MRC        | 47,XX+8 [3]                                                              |

|    |           |                                                                                             |                                                                                                              |                                                                                   |
|----|-----------|---------------------------------------------------------------------------------------------|--------------------------------------------------------------------------------------------------------------|-----------------------------------------------------------------------------------|
| 11 | MDS-EB II | 46,XX,t(3;3)(q21;q26), del(7)(q11;1) [15], 46 XX, [5]                                       | MDS-EB I                                                                                                     | 46,XY[25], FISH: -7q (9,5%); -7 (10,5%)                                           |
| 12 | MDS-EB II | 46,XX,del(9)(p22)[9]/46,XX[14]                                                              | MDS-MLD CR,                                                                                                  | del (9)(p22)                                                                      |
| 13 | CMML I    | 46,XY [20]                                                                                  | molecular relapse                                                                                            | 46,XY[4]/46,XX[19]                                                                |
| 14 | MDS-EB I  | 46,XY                                                                                       | MDS-EB I CR,                                                                                                 | 46,XY[20]/del(7q)//-Y[2]                                                          |
| 15 | MDS-EB II | 45,XY,der(5)t(5;20)(q11;?),+der(5)t(5;20)(q11;?), -13,-18,-20,+mar[1]/46,XY[22]             | molecular relapse                                                                                            | 43,XY,der(5;20),-13,-18[1]/45,XY,+Y,der(5;20)x2,-13,-18[1]/46,XY[23]              |
| 16 | MDS-EB II | t(2;11)(p21;q23);del(5q)(q22q33)[20]/46, XY [3]                                             | MDS-EB I                                                                                                     | 47,XY,t(2;11)(p21;q23),del(5)(q22q33),add(19)(q13),+21[12]/46,XY811]              |
| 17 | MDS-EB II | 46,XX                                                                                       | MDS-EB II                                                                                                    | 46,XX[5]/46,XY[14]                                                                |
| 18 | MDS-EB I  | 47,XY,+6[4]/46,XY[21]                                                                       | MDS-EB I                                                                                                     | 46XX[7]/48,XY,+8,+21                                                              |
| 19 | MDS-EB II | 45,XY,del(5)(q22q34),-7,t(6;21)(p25;q11)[2]                                                 | MDS-EB I 22,+2mar[9]/44,Xder,der(12;14)(q11;q11)[1]/44,idem,t (1;2)(p13;q35),der(12;14)(q11;q11)[9]/46,XY[4] |                                                                                   |
| 20 | AML-MRC   | 47,XX,+8 (17)/46, XX (5)                                                                    | AML-MRC                                                                                                      | 47, X, X, t(1,12) (p21;q24), t(3;5) (q12;p15) +8, der (12) [20] / 46, XX [4]      |
| 21 | AML-MRC   | 53,XY,+4,t(6;11;14)(q27,q23,q24),+9,+13,+16,+21,+22                                         | AML                                                                                                          | missing                                                                           |
| 22 | MDS-EB II | 46,XY                                                                                       | AML                                                                                                          | missing                                                                           |
| 23 | MDS-EB I  | 46,XY,+1,+der(1;14)(q11;q11)[20]/46 XY[2]                                                   | MDS-MLD                                                                                                      | 46,XY, +1,der(1;14)(q10;p10)[19]/46,idem,del (20)(q11)[2]/46,XY[2]                |
| 24 | AML-MRC   | XY,add(8)(q24),del(11)(q13),del(17)(p11),+19,+19,+20,+21 [11]/46, XY[13]                    | AML-MRC                                                                                                      | XY, add(8)(q24), del(11)(q13), del(17)(p11), +19, +19, +20, +21 [11]/ 46, XY [13] |
| 25 | MDS-EB II | 44-46,XY,t(2;?3)(p23~25;q12~21),-5,add12(p1?),-17,-19,+1~3mar[19]/88~90,idem x2[2]/46,XY[4] | molecular relapse CR,                                                                                        | FISH: del17p, del5q                                                               |
| 26 | AML-MRC   | 46,XX                                                                                       | molecular relapse                                                                                            | 46, XY                                                                            |
| 27 | MDS-EB I  | 44-46,XY,-5,der(6),t(6;17)(p23;q11),+1-2mar[24] 46,XY [8]                                   | MDS-MLD                                                                                                      | 44, XY, -5, der(6)t(6;17)(p25;q11),mar[2]/ 46, XX[26]                             |
| 28 | AML-MRC   | 51,XX,71,del(5)(q22;q33),+11,+14,+15,-21                                                    | AML-MRC                                                                                                      | 46,XY[21]                                                                         |
| 29 | MDS-MLD   | 46,XX,del(5)(q22q33),del(6)(q23),del(20)(q13)[2] 2]/46,XX[2]                                | MDS-MLD                                                                                                      | 46,XX,del(5)(q22q33),del(6)(q23),del(20)(q13)[22]/46, XX[2]                       |
| 30 | AML-MRC   | 45,XY,-7[20]                                                                                | MDS-EB I                                                                                                     | 45,XY,-7[2],26,XY[24], FISH 5,2% 43,XY,del(5)(q22q34),-7,-12,-                    |
| 31 | AML-MRC   | 43,XY,-7,-12,-14,del(5q),del(16)(q13)                                                       | MDS-EB I                                                                                                     | 14,del(16)(q13),add(18)(q23) [5]/44,idem,+(3;?) (p12;?) [3]/46, XY[17]            |
| 32 | MDS-MLD   | 46,XX                                                                                       | AML CR,                                                                                                      | 46, XX, t(9;22)(q34;q11) [28]                                                     |
| 33 | AML-MRC   | 47,XY,+8                                                                                    | molecular relapse                                                                                            | 47,XY,+8                                                                          |
| 34 | MDS-EB I  | 46,XX                                                                                       | molecular relapse CR,                                                                                        | 46,XY                                                                             |
| 35 | AML-MRC   | 46,XY,t(1;12)(q21;p12)[21]/48,idem,+8,+8[4]                                                 | molecular relapse                                                                                            | 46,XY,t(1;12)(q21;p12)[21]/48,idem,+8,+8[4]                                       |
| 36 | AML-MRC   | 42,XX,der(9,17)(p10;q10),der(11)dyp(11)(q13q23),t(11,13)(q23,q11) der(16),-18[18]/46,XX [6] | CR, molecular relapse                                                                                        | 46,XY[23]                                                                         |

|    |           |                                                                                                                                                                                                                        |                       |                                                                                                                                                  |
|----|-----------|------------------------------------------------------------------------------------------------------------------------------------------------------------------------------------------------------------------------|-----------------------|--------------------------------------------------------------------------------------------------------------------------------------------------|
| 37 | AML-MRC   | 49~51,XY,+Y,+12,+21,+del(12)(q21q22),+idic(21)(q22)x1~3[cp9]                                                                                                                                                           | AML-MRC               | 51,XY,+12,+21,+21,+21 [12]                                                                                                                       |
| 38 | CMML II   | 46,XY                                                                                                                                                                                                                  | AML-MRC               | 46,XY,add(1)(q32)[10]/46,XY,t(18;21)(q12.1;q13)[9]/46,XY[4]                                                                                      |
| 39 | AML-MRC   | 46,XX,add(1)(p13),der(1;8)(p10;p10),der(5)t(5;8)(q13;q22),-20,20~25dmin[20],46,XX[1]                                                                                                                                   | AML-MRC               | 46; XX, del (1) (p22), der(5) t(5;?) (q22;?), + der(8) t(1;8) (q22;q22), add(12) (p11) ? del (16) (q23) add (17) (q11), -20, -22[12], + mar [28] |
| 40 | MDS-EB II | 46,XY[23]                                                                                                                                                                                                              | CR, molecular relapse | 44, XY, del(4) (q31), -5, del(7) (q22), add (9) (p21), add (17) (q11), add (20) (p12), -21, -22, +r[5], + mar[6][22]/46 XY[4]                    |
| 41 | MDS-EB II | 46, XY                                                                                                                                                                                                                 | CR, molecular relapse | 46,XY[25]                                                                                                                                        |
| 42 | MDS-EB II | 46, XY                                                                                                                                                                                                                 | MDS-EB I              | 46, XY, del(3)(q21q25)[18]/47idem+8[5]                                                                                                           |
| 43 | MDS-EB II | 47,XX,der(3)t(3;?4)(p21;q23)add(3)(q29),del(4)(q21q?33),del(5)(q21q34),+mar1[10]/46,al,-17,-mar1,+mar2[5]/45,adl1,-21,-mar2,+mar3[2],FISH: 48,5% Inversion 3; 78,6% Deletion 5q; 26,8% Deletion 17p13 und 17p11 40-42, | MDS-EB I              | 46,XY[10]/47,XX,der(3)t(4;3;5),del(4)(q21),del(5)(q22;q33),+7,-17,+mar[3]                                                                        |
| 44 | AML-MRC   | XY,del(2)(q?31),der(4)t(4;13)(q27;q?)del(5)(q11),-7,-13,add(17)(q23),-19,-20[2]/46,XY[27]                                                                                                                              | AML-MRC               | 42, XY, del(2) (q31), der(4) t(4;13) (q? 27;q?11), del(5) (q11q33), -7, -13, add(17) (q23) -19, -20 [21]                                         |
| 45 | AML-MRC   | 46, XY                                                                                                                                                                                                                 | AML-MRC               | 46,XY[24]                                                                                                                                        |
| 46 | MDS-EB I  | 46,XY,del(5)(q22q23),-7,del(12)(p11),+mar[21]/46,XY[3]                                                                                                                                                                 | MDS-MLD               | 46,XY,del(5)(q22q23),-7,del(12)(p11),-18,add(19)(q13),+mar[13]/46,idem,del(17)(p11)[3]                                                           |
| 47 | MDS-u     | 46,XX,t(1;5)(p31;q?33)[20]/46,XX                                                                                                                                                                                       | MDS-EB II             | 46,XX                                                                                                                                            |
| 48 | CMML I    | 47,XX,+8,del(12)(p12)[11]/48,idem,+add(9)(q11)[5]/50,idem,+9,+13,+22[8]                                                                                                                                                | CMML II               | 47,XX,del(6)(q21),+8,del(12)(q21),add(20)(p11)[15]/46,XY[9]                                                                                      |
| 49 | MDS-MLD   | 46, XY                                                                                                                                                                                                                 | MDS-EB II             | 46,XY                                                                                                                                            |
| 50 | AML-MRC   | 46, XY, der(4)t(4;13)(p16;q14), del(12)q(21),-13,-15, del(22)(q11), der(?) t(1;?)(p22;?),+mar [18]                                                                                                                     | molecular relapse     | 46, XY, der(4)t(4;13)(p16;q14), del(12)q(21),-13, -15, del(22)(q11), der(?) t(1;?)(p22;?),+mar [18]                                              |
| 51 | MDS-EB II | 46, XX, del(20)(q11)[20], 46, XX[6]                                                                                                                                                                                    | MDS-MLD               | 46,XX,del(20q)(q11)[3]/46,XY[22]                                                                                                                 |
| 52 | MDS-EB II | 49, XX, +8, +12, +13, i (17)(q10)(4), 46, XX (12), FISH: 42-47, XY, add(1) (p36), der(3), del(3) (p21p11) add(3) (q26),                                                                                                | CR, molecular relapse | 48, XX, +8, +13, i(17) (q10) [6] 46, XX [18]                                                                                                     |
| 53 | MDS-EB II | -5, -6, -8[8], add(9) (q34) [4], add(17) (p11), -18, +22[3], +2-4 mar [14] / 46, XY                                                                                                                                    | AML                   | 46,XY[28]                                                                                                                                        |
| 54 | MDS-EB II | 46, XY                                                                                                                                                                                                                 | CR, molecular relapse | 46,XY                                                                                                                                            |
| 55 | MDS-u     | 47, XY +8[5], 46 XY[19] und zudem 45 XY-7[2]                                                                                                                                                                           | MDS-SLD               | 46, XY                                                                                                                                           |
| 56 | CMML II   | 46, XY                                                                                                                                                                                                                 | MDS-EB II             | FISH: Del 21p                                                                                                                                    |
| 57 | MDS-EB II | 46,XY                                                                                                                                                                                                                  | MDS-EB I              | 46,XY, t(2;21)(q31;q22),der(9q)[20], 45,X, -Y [1], 46, XY[3]                                                                                     |
| 58 | MDS-EB II | 46, XX, +1, del(5)(q14q34),der(8)t(8;12)(q22;q22),der(12)t(8;12)(q24;p12)t(8;12)(q22;q22),der(13;17)(q10;q10), FISH: Deletion 5q31, Deletion ETV6, Deletion TP53/17p                                                   | CR, molecular relapse | 42,X,-X,+del(1)(q21),del(5)(q22q33),-7,del(8)(q?),add(11)(q23),del(12)(p13),der(13;17)(q10;q10),-16,-17,der(21),-22[4]/46,XX[20]                 |

|    |                             |                                                                                                                                                                                           |                          |                                                                                                                                      |
|----|-----------------------------|-------------------------------------------------------------------------------------------------------------------------------------------------------------------------------------------|--------------------------|--------------------------------------------------------------------------------------------------------------------------------------|
| 59 | MDS-EB I                    | 46,XY,+1, del(6)t(1;6)(q21;p23)[16]/46,XY[14]                                                                                                                                             | CR,<br>molecular relapse | t(12;21)(p11;p11)                                                                                                                    |
| 60 | MDS-RS                      | 46, XX                                                                                                                                                                                    | MDS-EB II                | 46,XX                                                                                                                                |
| 61 | CMML 0                      | 47, XY +21                                                                                                                                                                                | molecular relapse        | 47,XY,+21[13]/46,XX[11], FISH 39,2                                                                                                   |
| 62 | MDS-EB II                   | 47, XX, +8, +9                                                                                                                                                                            | MDS-EB I                 | 46,XX[12]/46XY[20]                                                                                                                   |
| 63 | AML-MRC                     | 46,XX,del(7)(q22q23)[2]/46,XX[23]                                                                                                                                                         | CR,<br>molecular relapse | 46,XX,del(7)(q22)[8]/46,idem,add(15)(q24)[5]/46,XX[11]                                                                               |
| 64 | AML-MRC                     | 46,XY                                                                                                                                                                                     | AML                      | 46, XY [1] / 46, XX [23]                                                                                                             |
| 65 | MDS-EB I                    | 46,XX, t(2;3)(p23;q26),del(7)(q22q36)[12], 46, XX [2]                                                                                                                                     | CR,<br>molecular relapse | 46,XX, t(2;3)(p23;q26),del(7)(q22q36)[17], 46, XX [3]                                                                                |
| 66 | MDS-EB II                   | 46, XX                                                                                                                                                                                    | AML                      | 45, XX, der(6;17) (p11,q11), -6 [19]/ 46, XX [4]                                                                                     |
| 67 | MDS-EB II                   | 45,X-Y,inv(3)(q21q26)[1],46,XY[19]                                                                                                                                                        | CR,<br>molecular relapse | 45,X,-Y,inv(3)(q21q26),t(4;12)(q12;p12)[21]/ 46,idem,+8[2]                                                                           |
| 68 | MDS-EB II                   | 46,XY,del(5)(q1?3q3?1)[4]/45,XY, del(5)(q1?3q3?1),-7[12]/46,XY[8]/ 45,XY, del(5)(q1?3q3?1),-7,+21[1]                                                                                      | MDS-MLD                  | 46, XY, del (5) (q22q33) -7, +21 [2]<br>46, XY [22]                                                                                  |
| 69 | AML-MRC                     | 45,XY,-1,del(5)(q11),add(9)(p11),-9, del(11)(q21),del(12)(p11),-15,-17,+mar1,+mar2,[13]/45,XY,del(1)(q32), del(5)(q11),add(9)(p11),-12,-13,add(14)(p11),-15,-17,+mar1,+mar3[11]/ 46,XY[3] | AML-MRC                  | 43-44, XY, del(1)(q32), del (5)(q11), add (9)(p24), del(9)(q22), add(11)(p15), add(12)(p11), add(12)(q24), -15, -17[9] / 46, XY [23] |
| 70 | MDS-EB I                    | 46, XY                                                                                                                                                                                    | CR,<br>molecular relapse | 46,XY                                                                                                                                |
| 71 | AML-MRC                     | 46,XX,del(7)(q32)                                                                                                                                                                         | AML-MRC                  | 46, XX, del(7)(q32), del(11) (p15) [4] / 46, XY [20]                                                                                 |
| 72 | CMML I                      | 46, XY                                                                                                                                                                                    | MDS-MLD                  | 46, XY, t(1;2) (p36,p21) [22]<br>46, XY [2]                                                                                          |
| 73 | AML-MRC                     | 46,XY[24]                                                                                                                                                                                 | AML-MRC                  | (73,4%) 46, XY [22] \ \ 46, XX [8]                                                                                                   |
| 74 | MDS-MLD                     | 47, XY +8                                                                                                                                                                                 | AML                      | 47, XY, +8, +(8;16)(p11;p13) [9] / 46, XY [6] / 46, XX [9]                                                                           |
| 75 | AML-MRC bis undifferenziert | 46,XX[26]                                                                                                                                                                                 | MDS-EB II                | 46,XX[24]                                                                                                                            |
| 76 | MDS-EB I                    | 45,XY,-7[19]                                                                                                                                                                              | MDS-EB I                 | 46,XY[26]                                                                                                                            |
| 77 | AML-MRC                     | 46,XY                                                                                                                                                                                     | CR,<br>molecular relapse | 46, XY [24]                                                                                                                          |
| 78 | MDS-EB II                   | 46, XY                                                                                                                                                                                    | AML                      | 46,XY                                                                                                                                |
| 79 | MDS-EB I                    | 46, XY                                                                                                                                                                                    | MDS-EB I                 | 46, XY [20]                                                                                                                          |
| 80 | MDS-EB I                    | 46, XY                                                                                                                                                                                    | molecular relapse        | 46, XX                                                                                                                               |
| 81 | MDS-EB I                    | 46, XY                                                                                                                                                                                    | AML-MRC                  | 46,XY[12]/46,XX[12]                                                                                                                  |
| 82 | AML-MRC                     | 43-46 XX, t(3;11), del(5q), -7, add(14)(q11), der(18), -19, -21, +2mar[20]/46,XX[4]                                                                                                       | MDS-EB I                 | 43-46 XX, t(3;11), del(5q), -7, add(14)(q11), der(18), -19, -21, +2mar[20]/46,XX[4]                                                  |
| 83 | AML-MRC                     | 46, XY                                                                                                                                                                                    | AML                      | 46,XY                                                                                                                                |
| 84 | MDS-MLD                     | 47,XX + 8,del(5q)(14q31)                                                                                                                                                                  | MDS-EB I                 | del(5q)(14q31)                                                                                                                       |

|    |           |                                                     |                       |                                                                       |
|----|-----------|-----------------------------------------------------|-----------------------|-----------------------------------------------------------------------|
| 85 | MDS-MLD   | 45,X, -Y                                            | MDS-MLD               | 46, XY                                                                |
| 86 | AML-MRC   | 45,XX,-7                                            | MDS-MLD               | 45, XX, -7                                                            |
| 87 | AML-MRC   | 47,XX,+21[7]/ 46,XX[14]                             | MDS-EB II             | 46,XX,add(5)(q35),del(7)(p15)[9]/46,XY[15]                            |
| 88 | MDS-EB II | 46,XX,t(8;12)(q24;q13),del(20)(q11q13),add(17)(p13) | MDS-EB II CR,         | 46, XX, t(8;12) (q24;q11), add(17) (p11), der(20) / [19] / 46, XX [5] |
| 89 | MDS-EB II | 48, XXY, +8, add(21p)                               | molecular relapse     | 48, XXY, +8, add(21p)                                                 |
| 90 | MDS-u     | 48, XX, +4, +11 [11]                                | MDS-MLD               | 46, XX[4]/46, XY[27]                                                  |
| 91 | MDS-EB I  | 46, XY                                              | CR with MLD/MD S-EB I | missing                                                               |

AML, acute myeloid leukemia; AML-MRC, acute myeloid leukemia with myelodysplasia related changes; CMML-0/-I/-II, chronic myelomonocytic leukemia; CR, complete remission; MDS-EBI/-EBII, myelodysplastic syndrome with excess of blasts I/II; MDS-MLD, myelodysplastic syndrome with multilineage dysplasia; MDS-SLD, myelodysplastic syndrome with single lineage dysplasia; MDS-RS-MLD, myelodysplastic syndrome with multilineage dysplasia and ring sideroblasts; MDS-RS-SLD, myelodysplastic syndrome with single lineage dysplasia and ring sideroblasts; MDS-u, myelodysplastic syndrome unclassifiable; WHO, world health organization.

**Table S3.** Treatment of Relapse and Response.

|                       |             | Response | No Response |
|-----------------------|-------------|----------|-------------|
| <b>Early Relapse</b>  | <b>n=56</b> |          |             |
| Intensive salvage     | 15          | 4        | 11          |
| Non-intensive salvage | 41          | 16       | 25          |
| <b>Late Relapse</b>   | <b>n=35</b> |          |             |
| Intensive salvage     | 10          | 5        | 5           |
| Non-intensive salvage | 25          | 17       | 8           |

Intensive salvage therapy represents chemotherapy-based salvage regimens such as FLAG-Ida or high dose cytarabine and mitoxantrone and/or second allogeneic stem cell transplantation. Non-intensive salvage therapy represents chemotherapy-based salvage regimens such as Hypomethylating agents +/- Venetoclax +/- Donor Lymphocyte Infusions.
